# Supplementary material for: Two-dimensional confined electron donor–acceptor co-intercalated inorganic/organic nanocomposites: an effective photocatalyst for dye degradation
Source: Royal Society of Chemistry journal article supplement (doi:10.1039/c6ra25534e), 2017-01-01
Supplement: c6ra25534e1.pdf [file c6ra25534e1.pdf]

## *Supporting Information*

# **Two-Dimensional Confined Electron Donor–Acceptor Co-intercalated Inorganic/Organic Nanocomposites: An Effective Photocatalyst for Dye Degradation**

Shufang Zheng,<sup>†</sup> Jun Lu,<sup>\*,†,‡</sup> Jingjing Shi,<sup>†</sup> and Xue Duan<sup>†</sup>

<sup>†</sup>State Key Laboratory of Chemical Resource Engineering, Beijing University of Chemical Technology, 15 Beisanhuan East Road, P. Box 98, Beijing 100029, P. R. China

<sup>‡</sup>Beijing Engineering Center for Hierarchical Catalysts, Beijing University of Chemical Technology, 15 Beisanhuan East Road, P. Box 98, Beijing 100029, P. R. China

### **List of Contents**

#### **1. Structural characterization and optical absorption spectra of CuPcTS-PTCB(*x*%) /LDHs**

**Table S1.** The elemental composition of CuPcTS-PTCB(*x*%) /LDHs.

**Figure S1.** The FT-IR spectra, (a) PTCB and PTCB, (b) a-CuPcTS/LDHs; b-CuPcTS-PTCB (36.63%) /LDHs; c-CuPcTS-PTCB(49.75%) /LDHs; d-CuPcTS-PTCB(63.64%) /LDHs; e-CuPcTS-PTCB(77.73%) /LDHs; f-CuPcTS-PTCB(90.91%) /LDHs; g-PTCB/LDHs.

**Figure S2.** The layer spacing of CuPcTS-PTCB(*x*%) /LDHs.

**Figure S3.** The molecular models of CuPcTS and PTCB calculated by Gaussian 09 software.

**Figure S4.** The UV-vis absorption spectra of CuPcTS (15 μmol/L), PTCB (15 μmol/L), and CuPcTS@PTCB (15 μmol/L) aqueous solutions.

**Figure S5.** The UV-vis absorption spectra of CuPcTS-PTCB(*x*%) /LDHs.

**Figure S6.** HRTEM images of CuPcTS-PTCB(49.75%) /LDHs after 10 consecutive cycles of catalytic photodegradation of MO.

**Figure S7.** XRD patterns of the CuPcTS-PTCB( $x\%$ )/LDHs composites before and after 10 cycles photodegradation of MO.

## **2. The photocatalytic degradation of organic dyes for CuPcTS-PTCB( $x\%$ )/LDHs**

**Figure S8.** The comparison of photodegradation of MO under the simulated solar irradiation.

**Figure S9.** Photocatalytic degradation of MO, AO, AY, MB, MV and RhB for CuPcTS-PTCB( $x\%$ )/LDHs.

**Figure S10.** Photocatalytic activity of (a) CuPcTS/LDHs, (b) PTCB/LDHs, and (c) P25 particles for MO.

**Figure S11.** Photocatalytic degradation of phenol for CuPcTS-PTCB(49.75%)/LDHs.

**Figure S12.** Adsorption amounts of MO on CuPcTS-PTCB( $x\%$ )/LDHs ( $x = 0, 36.63, 49.75, 63.64, 77.32, 90.91, 100$ ).

**Table S2** The BET surface of CuPcTS-PTCB( $x\%$ )/LDHs ( $x = 0, 36.63, 49.75, 63.64, 77.32, 90.91, 100$ )

## **3. Cyclic voltammograms curves and analysis of energy levels**

**Figure S13.** Cyclic voltammograms curves of Ferrocene.

**Figure S14.** Cyclic voltammograms curves of CuPcTS, PTCB, CuPcTS/LDHs, and PTCB/LDHs.

**Figure S15.** Cyclic voltammograms curves of MO, AO, AY, MB, MV, and RhB.

**Figure S16.** The Current–Voltage curves of CuPcTS-PTCB(49.75%)/LDHs in dark and light at a scanning rate of  $50 \text{ mV s}^{-1}$ . Inset: the EIS curve of CuPcTS-PTCB(49.75%)/LDHs.

# 1. Structural characterization and optical absorption spectra of CuPcTS-PTCB(x%)/LDHs

**Table S1.** The elemental composition of CuPcTS-PTCB(x%)/LDHs

| Nominal (x%) | Chemical Composition                                                                                   | Zn/Al Ratio | Determined (x%) |
|--------------|--------------------------------------------------------------------------------------------------------|-------------|-----------------|
| 0            | $Zn_{0.585}Al_{0.415}(OH)_2(C_{32}H_{12}N_8CuO_{12}S_4)_{0.073}(OH)_{0.123} \cdot 3.316H_2O$           | 1.41        | 0.00            |
| 10           | $Zn_{0.595}Al_{0.405}(OH)_2(C_{24}H_8O_8)_{0.037}(C_{32}H_{12}N_8CuO_{12}S_4)_{0.064} \cdot 2.197H_2O$ | 1.47        | 36.63           |
| 30           | $Zn_{0.603}Al_{0.397}(OH)_2(C_{24}H_8O_8)_{0.049}(C_{32}H_{12}N_8CuO_{12}S_4)_{0.050} \cdot 1.741H_2O$ | 1.52        | 49.75           |
| 50           | $Zn_{0.605}Al_{0.395}(OH)_2(C_{24}H_8O_8)_{0.063}(C_{32}H_{12}N_8CuO_{12}S_4)_{0.036} \cdot 1.873H_2O$ | 1.53        | 63.64           |
| 70           | $Zn_{0.611}Al_{0.389}(OH)_2(C_{24}H_8O_8)_{0.075}(C_{32}H_{12}N_8CuO_{12}S_4)_{0.022} \cdot 1.718H_2O$ | 1.57        | 77.32           |
| 90           | $Zn_{0.606}Al_{0.394}(OH)_2(C_{24}H_8O_8)_{0.090}(C_{32}H_{12}N_8CuO_{12}S_4)_{0.009} \cdot 2.313H_2O$ | 1.54        | 90.91           |
| 100          | $Zn_{0.595}Al_{0.405}(OH)_2(C_{24}H_8O_8)_{0.101} \cdot 0.507H_2O$                                     | 1.47        | 100.00          |

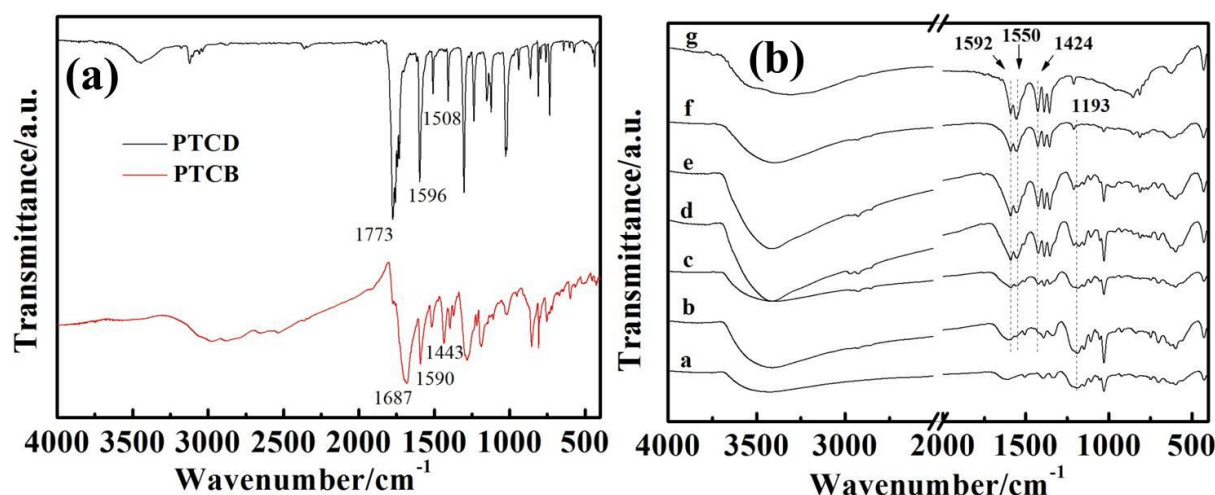

**Figure S1** The FT-IR spectra, (a) PTCD and PTCB, (b) a-CuPcTS/LDHs; b-CuPcTS-PTCB(36.63%)/LDHs; c-CuPcTS-PTCB(49.75%)/LDHs; d-CuPcTS-PTCB(63.64%)/LDHs; e-CuPcTS-PTCB(77.73%)/LDHs; f-CuPcTS-PTCB(90.91%)/LDHs; g-PTCB/LDHs.

For the FT-IR spectrum of pristine PTCD (**Figure S1a**), the strong band at  $1773\text{ cm}^{-1}$  was the characteristic CO–O–CO stretching vibration of the anhydride, and the bands at  $1596\text{ cm}^{-1}$  and  $1508\text{ cm}^{-1}$  were due to the skeleton vibration of phenyl ring. When the PTCD was hydrolyzed into PTCB, two bands corresponding to the vibrations of C=O in the –COOH group could be observed at  $1687\text{ cm}^{-1}$  and  $1590\text{ cm}^{-1}$  (**Figure S1a**), and the in plane deformation vibration of O–H appeared at  $1433\text{ cm}^{-1}$ . For the CuPcTS-PTCB(x%)/LDHs that included PTCB, the bands at  $1550\text{ cm}^{-1}$  and  $1424\text{ cm}^{-1}$

were due to the antisymmetric and symmetric stretching vibration of C–O<sup>-</sup> in the –COO<sup>-</sup> group. The skeleton vibration of the phenyl ring also appeared at 1592 cm<sup>-1</sup>. All those indicated that the PTCB was intercalated into Zn<sub>1.5</sub>Al-LDHs. The appearance of the characteristic absorption peak of –SO<sub>3</sub><sup>-1</sup> at 1193 cm<sup>-1</sup> (**Figure S1b**) suggested the successful intercalation of CuPcTS into the Zn<sub>1.5</sub>Al-LDHs.<sup>2</sup>

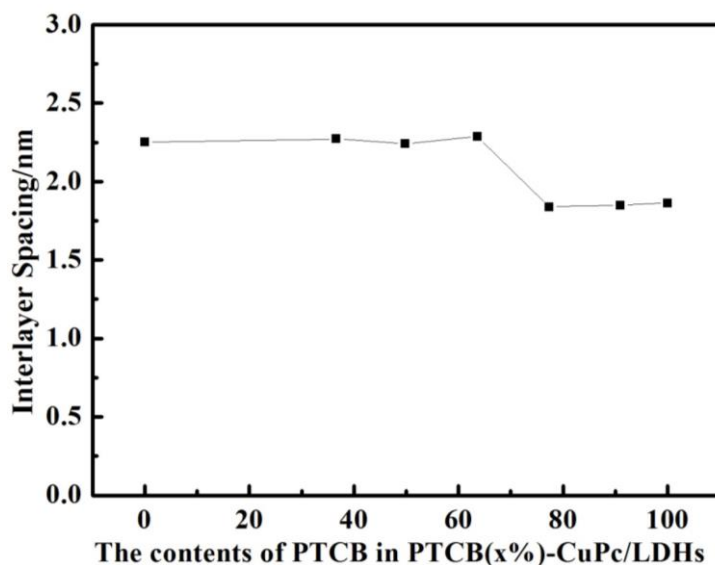

**Figure S2.** The layer spacing of CuPcTS-PTCB(x%)/LDHs.

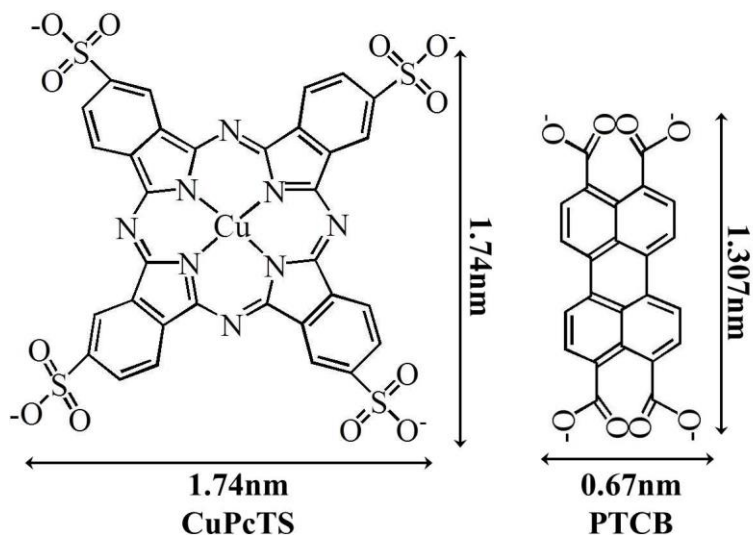

**Figure S3.** The molecular models of CuPcTS and PTCB calculated by Gaussian 09 software.

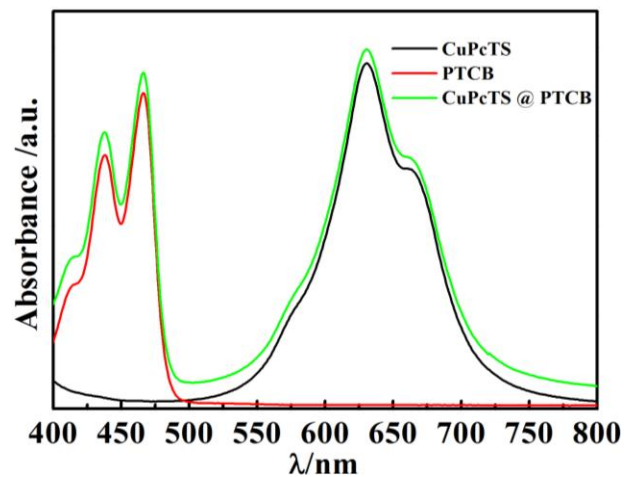

**Figure S4.** The UV-vis absorption spectra of CuPcTS (15  $\mu\text{mol/L}$ ), PTCB (15  $\mu\text{mol/L}$ ) and CuPcTS@PTCB (15  $\mu\text{mol/L}$ ) aqueous solutions.

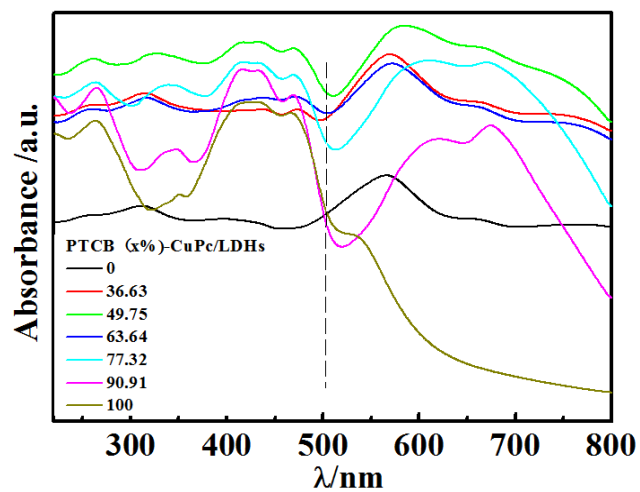

**Figure S5.** The UV-vis absorption spectra of CuPcTS-PTCB(x%)/LDHs.

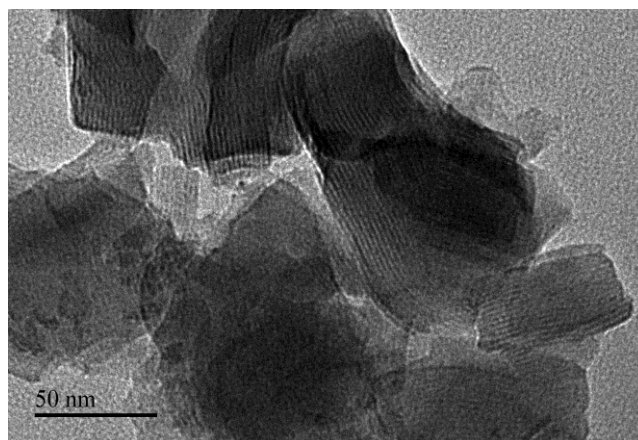

**Figure S6.** HRTEM image of CuPcTS-PTCB(49.75%)/LDHs after 10 consecutive cycles of catalytic photodegradation of MO.

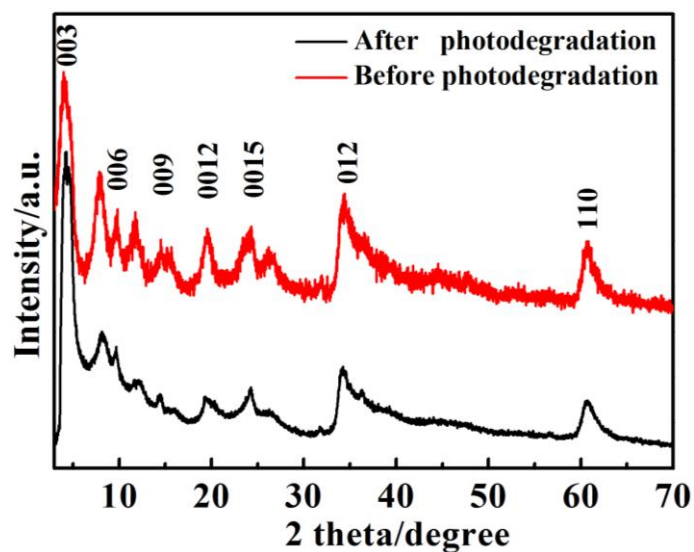

**Figure S7.** XRD patterns of the CuPcTS-PTCB( $x\%$ )/LDHs composites before and after 10 cycles photodegradation of MO.

## 2. The photocatalytic degradation of organic dyes for CuPcTS-PTCB( $x\%$ )/LDHs

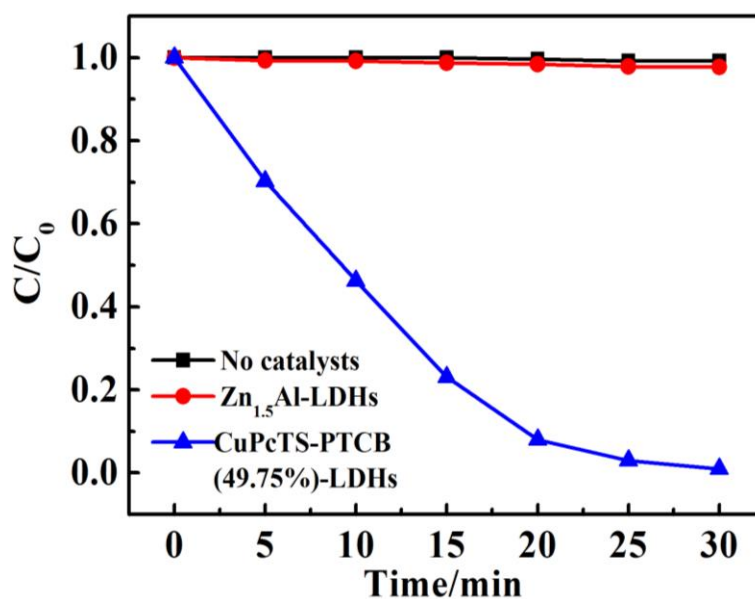

**Figure S8.** The comparison of photodegradation of MO under the simulated solar irradiation.

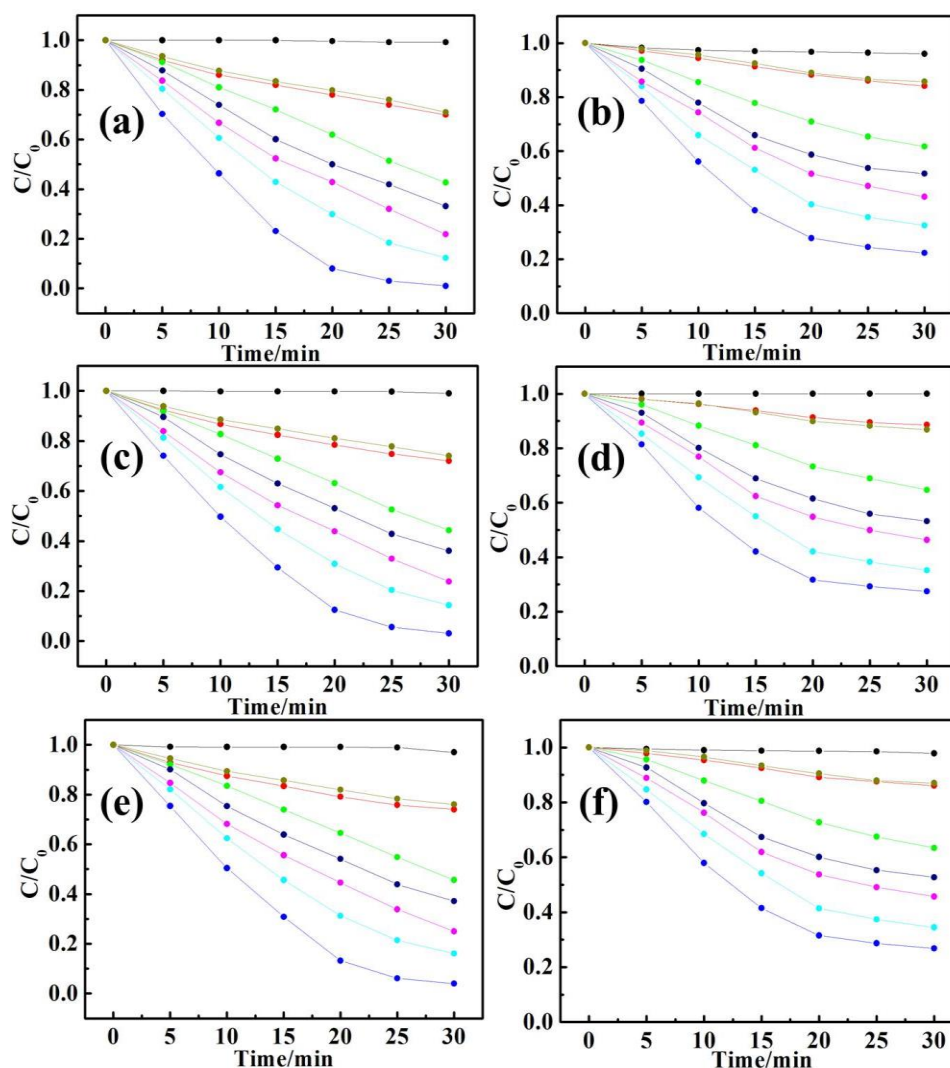

**Figure S9.** Photocatalytic degradation of MO (a), AO (c), AY (e), MB (b), MV (d) and RhB (f) for CuPcTS-PTCB( $x\%$ )/LDHs (no catalysts-black, CuPcTS/LDHs-red, CuPcTS-PTCB(36.63%)/LDHs-green, CuPcTS-PTCB(49.75%)/LDHs-blue, CuPcTS-PTCB(63.64%)/LDHs-cyan, CuPcTS-PTCB(77.32%)/LDHs-magenta, CuPcTS-PTCB(90.91%)/LDHs-navy, PTCB/LDHs-dark yellow).

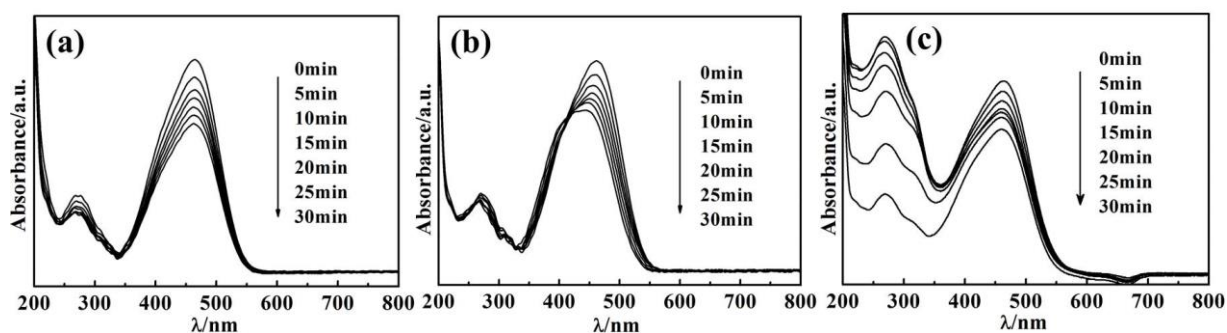

**Figure S10.** Photocatalytic activity of (a) CuPcTS/LDHs, (b) PTCB/LDHs, and (c) P25 particles for MO.

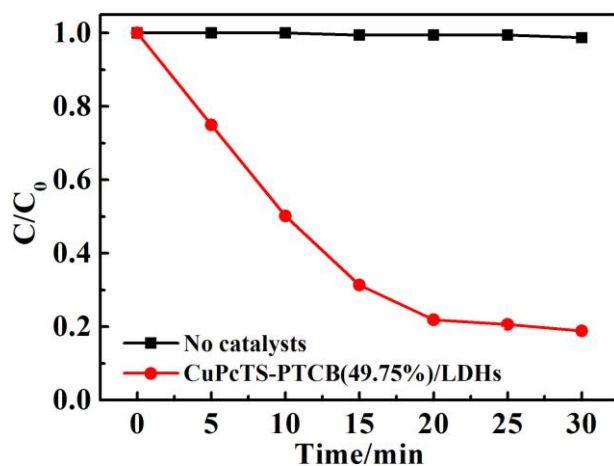

**Figure S11.** Photocatalytic degradation of phenol for CuPcTS-PTCB(49.75%)/LDHs.

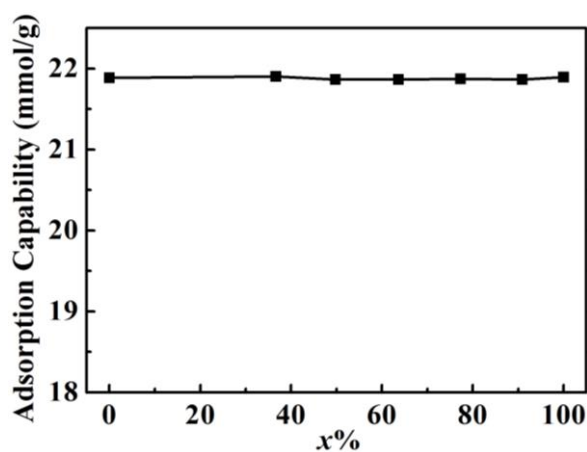

**Figure S12.** Adsorption amounts of MO on CuPcTS-PTCB(x%)/LDHs ( $x = 0, 36.63, 49.75, 63.64, 77.32, 90.91, 100$ ).

**Table S2.** The BET surface of CuPcTS-PTCB(x%)/LDHs ( $x = 0, 36.63, 49.75, 63.64, 77.32, 90.91, 100$ )

| Photocatalyst            | BET specific surface area ( $\text{m}^2 \text{g}^{-1}$ ) |
|--------------------------|----------------------------------------------------------|
| CuPcTS/LDHs              | 60.83                                                    |
| CuPcTS-PTCB(36.63%)/LDHs | 61.24                                                    |
| CuPcTS-PTCB(49.75%)/LDHs | 52.82                                                    |
| CuPcTS-PTCB(63.64%)/LDHs | 62.92                                                    |
| CuPcTS-PTCB(77.32%)/LDHs | 53.14                                                    |
| CuPcTS-PTCB(90.91%)/LDHs | 64.46                                                    |
| PTCB/LDHs                | 66.61                                                    |



### 3. Cyclic voltammograms curves and analysis of energy levels

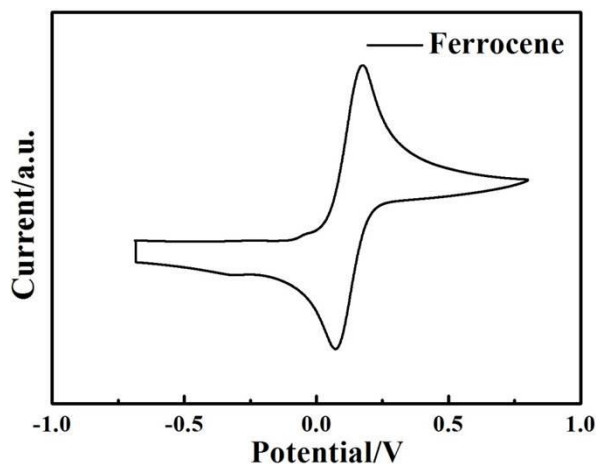

**Figure S13.** Cyclic voltammograms curves of Ferrocene.

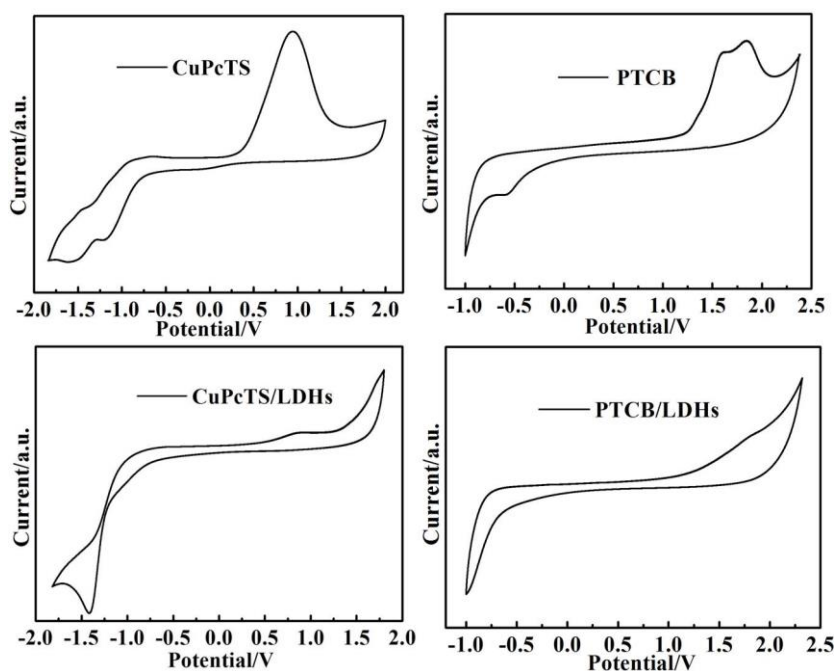

**Figure S14.** Cyclic voltammograms curves of CuPcTS, PTCB, CuPcTS/LDHs, and PTCB/LDHs.

The CV curves of CuPcTS/LDHs and PTCB/LDHs single-intercalated samples were also measured, provided that no remarkable difference in energy levels between the co-intercalated and single-intercalated composites.

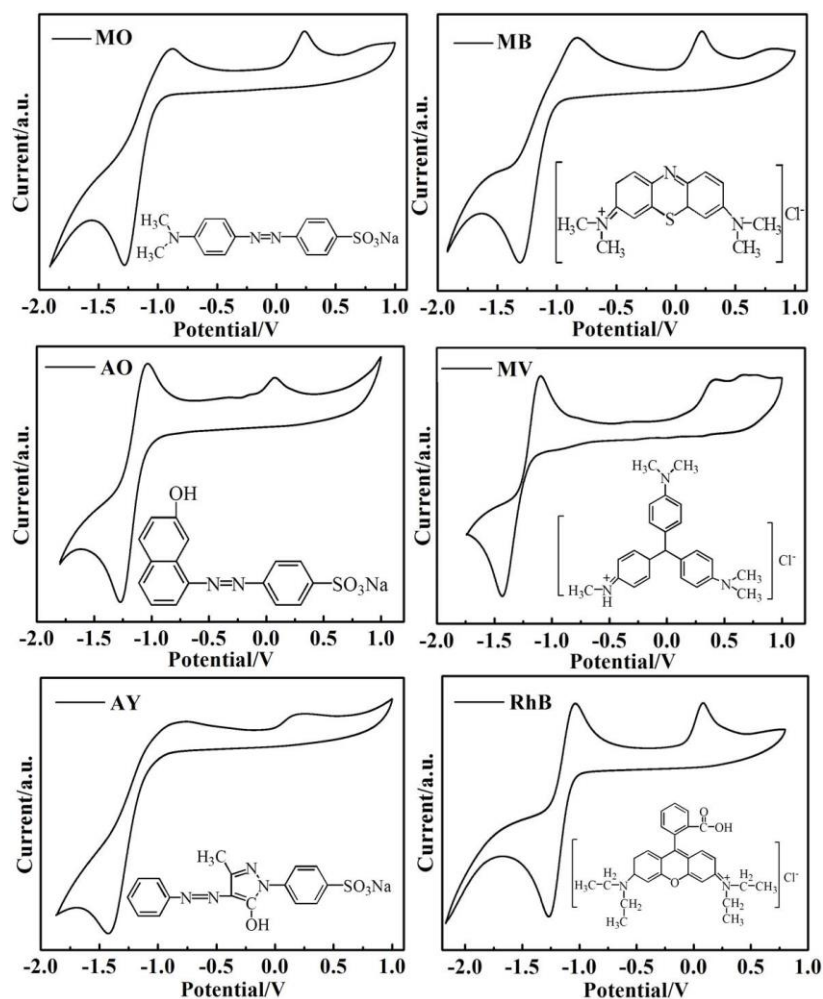

**Figure S15.** Cyclic voltammograms curves of MO, AO, AY, MB, MV, and RhB.

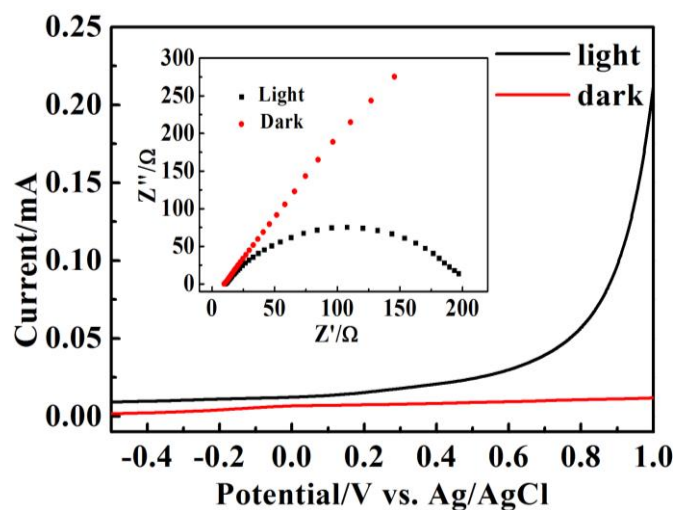

**Figure S16.** The Current–Voltage curves of CuPcTS-PTCB(49.75%)/LDHs in dark and light at a scanning rate of  $50 \text{ mV s}^{-1}$ . Inset: the EIS curve of CuPcTS-PTCB(49.75%)/LDHs.

## ***References***

- [1] D. Yan, J. Lu, M. Wei, J. Ma, D. G. Evans and X. Duan, *Phy. Chem. Chem. Phy.*, 2009, **11**, 9200–9209.
- [2] J. Wang, M. Wei, G. Rao, D. G. Evans and X. Duan, *J. Solid State Chem.*, 2004, **177**, 366–371.
